# Supplementary material for: Ack1 Mediated AKT/PKB Tyrosine 176 Phosphorylation Regulates Its Activation
Source: PubMed Central journal article supplement (PMC2841635; doi:10.1371/journal.pone.0009646), 2010-03-19
Supplement: pone.0009646.s002.pdf [file pone.0009646.s002.pdf]

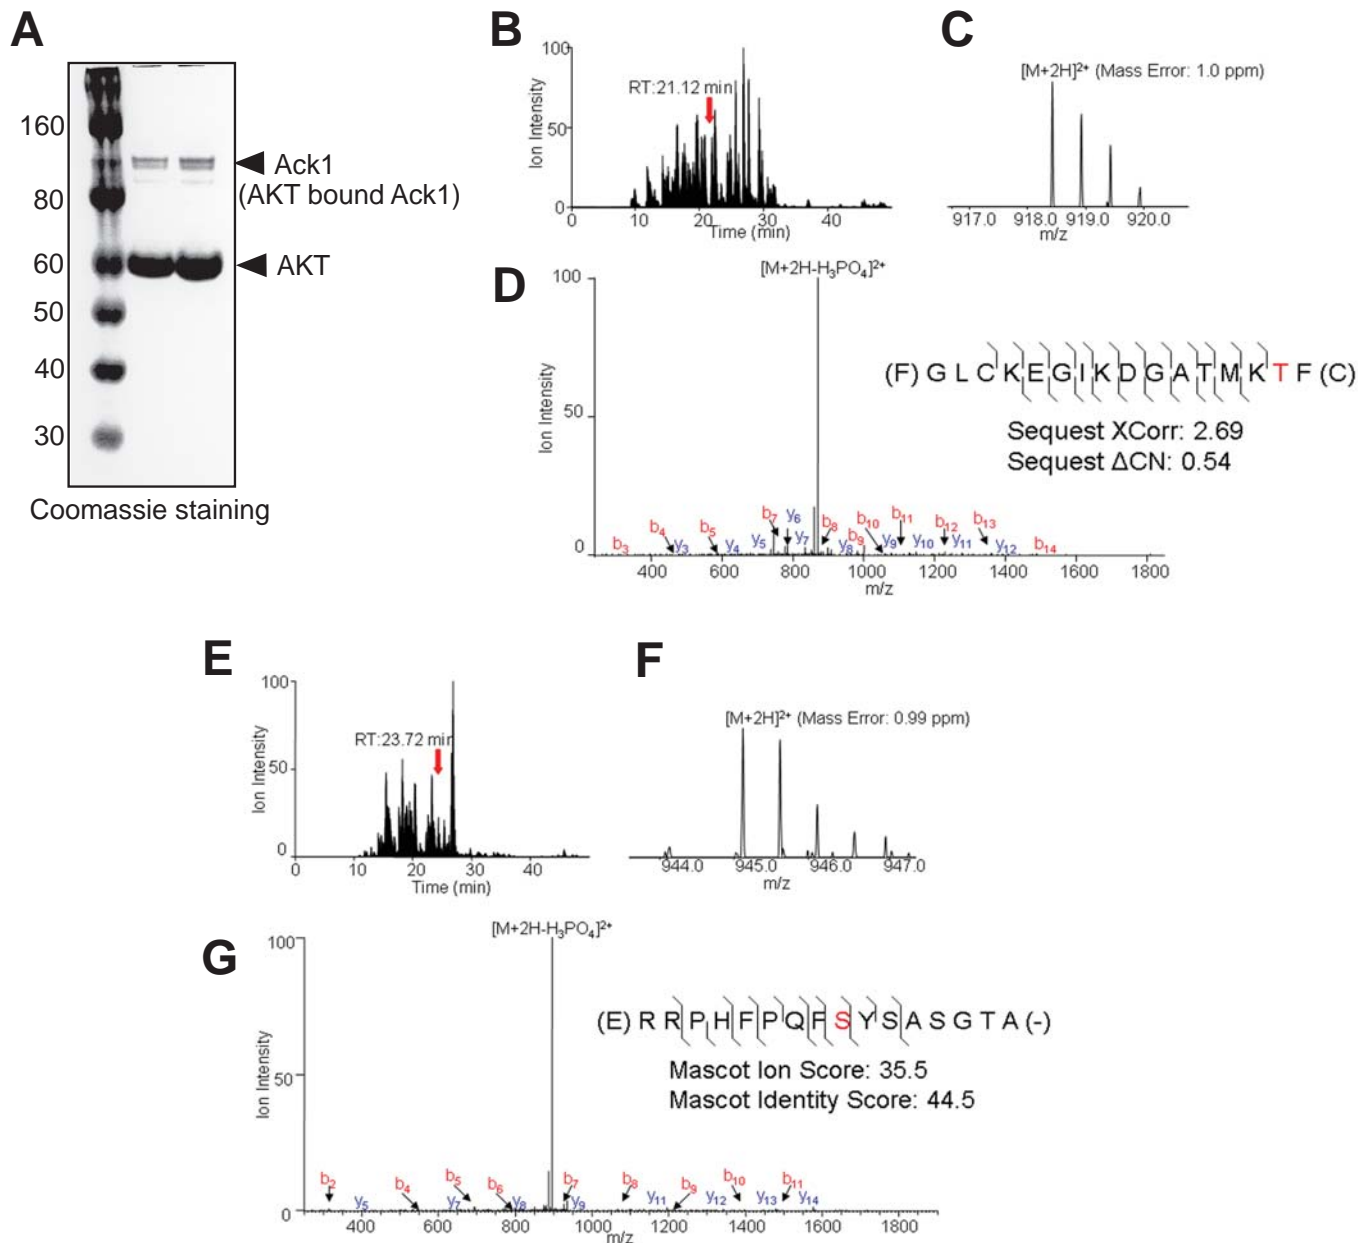

**Figure S2. Tyr176-phosphorylated AKT sample also contains Thr308 and Ser473 phosphorylated AKT.** (A) Activated Ack1 (caAck) and HA-tagged AKT were coexpressed in HEK293T cells followed by IP with HA-beads. IP AKT was subjected to SDS-PAGE electrophoresis and the gel was stained Coomassie. A prominent band of ~59 kDa corresponding to AKT is seen which was excised and subjected to mass spectrometry as described in methods section. The upper ~113 kDa band corresponds to caAck1 that bound to AKT. (B) Purified AKT peptide preparation that lead to the identification of pTyr176-AKT was assessed for other phosphorylation events. A peptide was detected at 21.12 mins in the total ion chromatogram with mass-to-charge ratio 918.43, which represents an error of 1.0 ppm (C). (D) The tandem mass spectrum matched the sequence, FGLCKEGLIKD GATMK $\underline{p}$ TFC indicating that Thr308 in AKT was phosphorylated; the detection of the phosphothreonine  $y_3$  is consistent with this localization. (E) Another peptide was detected at 23.72 mins in the total ion chromatogram with mass-to-charge ratio 944.93, which represents an error of 0.99 ppm (F). (G) The tandem mass spectrum matched the sequence, ERRPHFPQF $\underline{p}$ SYSASGTA(-) indicating that Ser473 in AKT was phosphorylated; the detection of  $b_8$ ,  $b_9$ ,  $y_7$  and  $y_8$  is consistent with this localization.
