# Supplementary material for: Ack1 Mediated AKT/PKB Tyrosine 176 Phosphorylation Regulates Its Activation
Source: PubMed Central journal article supplement (PMC2841635; doi:10.1371/journal.pone.0009646), 2010-03-19
Supplement: pone.0009646.s010.pdf [file pone.0009646.s010.pdf]

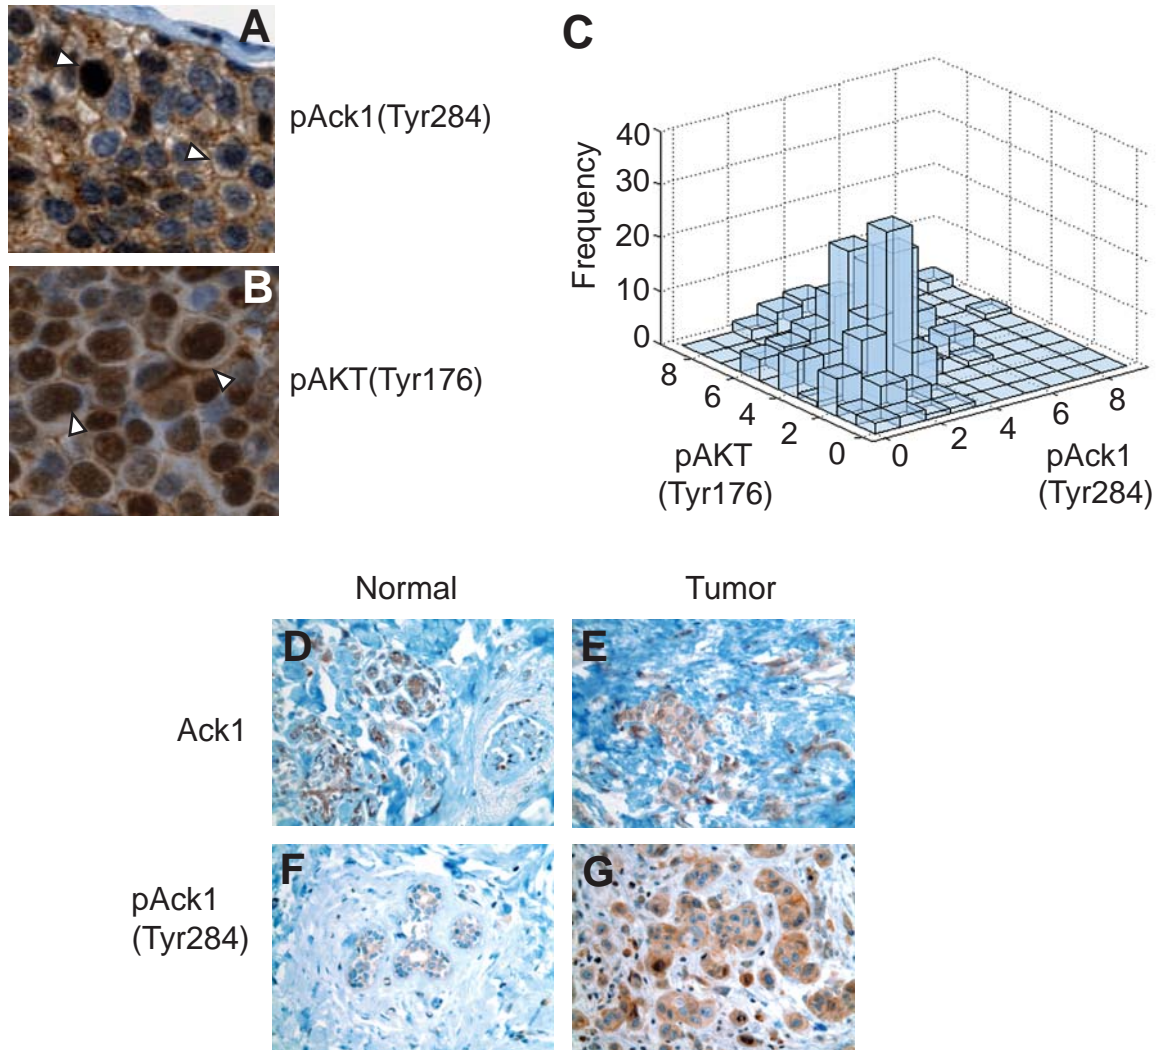

**Figure S10. Staining of tumor samples with Tyr284-phosphorylated-Ack1 and Tyr176-phosphorylated-AKT antibodies.** Representations of Tyr284-phosphorylated-Ack1 (**A**) and Tyr176-phosphorylated-AKT (**B**) staining of IDC, which show intense staining in nuclei and membrane. (**C**) Expression levels between Tyr284-phosphorylated-Ack1 and Tyr176-phosphorylated-AKT expression were significantly correlated in breast tumors (Spearman rank correlation coefficient  $\rho = 0.43$ ,  $p < 0.0001$ ). (**D-G**) Breast samples stained with Ack1 and pAck1(Tyr284) antibodies. Basal levels of Ack1 expression were seen in both normal and tumor samples (**D, E**), however, significant increase in pAck1(Tyr284) staining was seen in tumor samples as contrast to normal breast sample (compare **F** and **G**).
